# Supplementary material for: Association between dietary antioxidant vitamins intake and homocysteine levels in middle-aged and older adults with hypertension: a cross-sectional study
Source: HighWire-hosted journal article supplement (doi:10.1136/bmjopen-2020-045732), 2021-10-01
Supplement: bmjopen-2020-045732supp001_data_supplement.pdf [file bmjopen-2020-045732supp001_data_supplement.pdf]

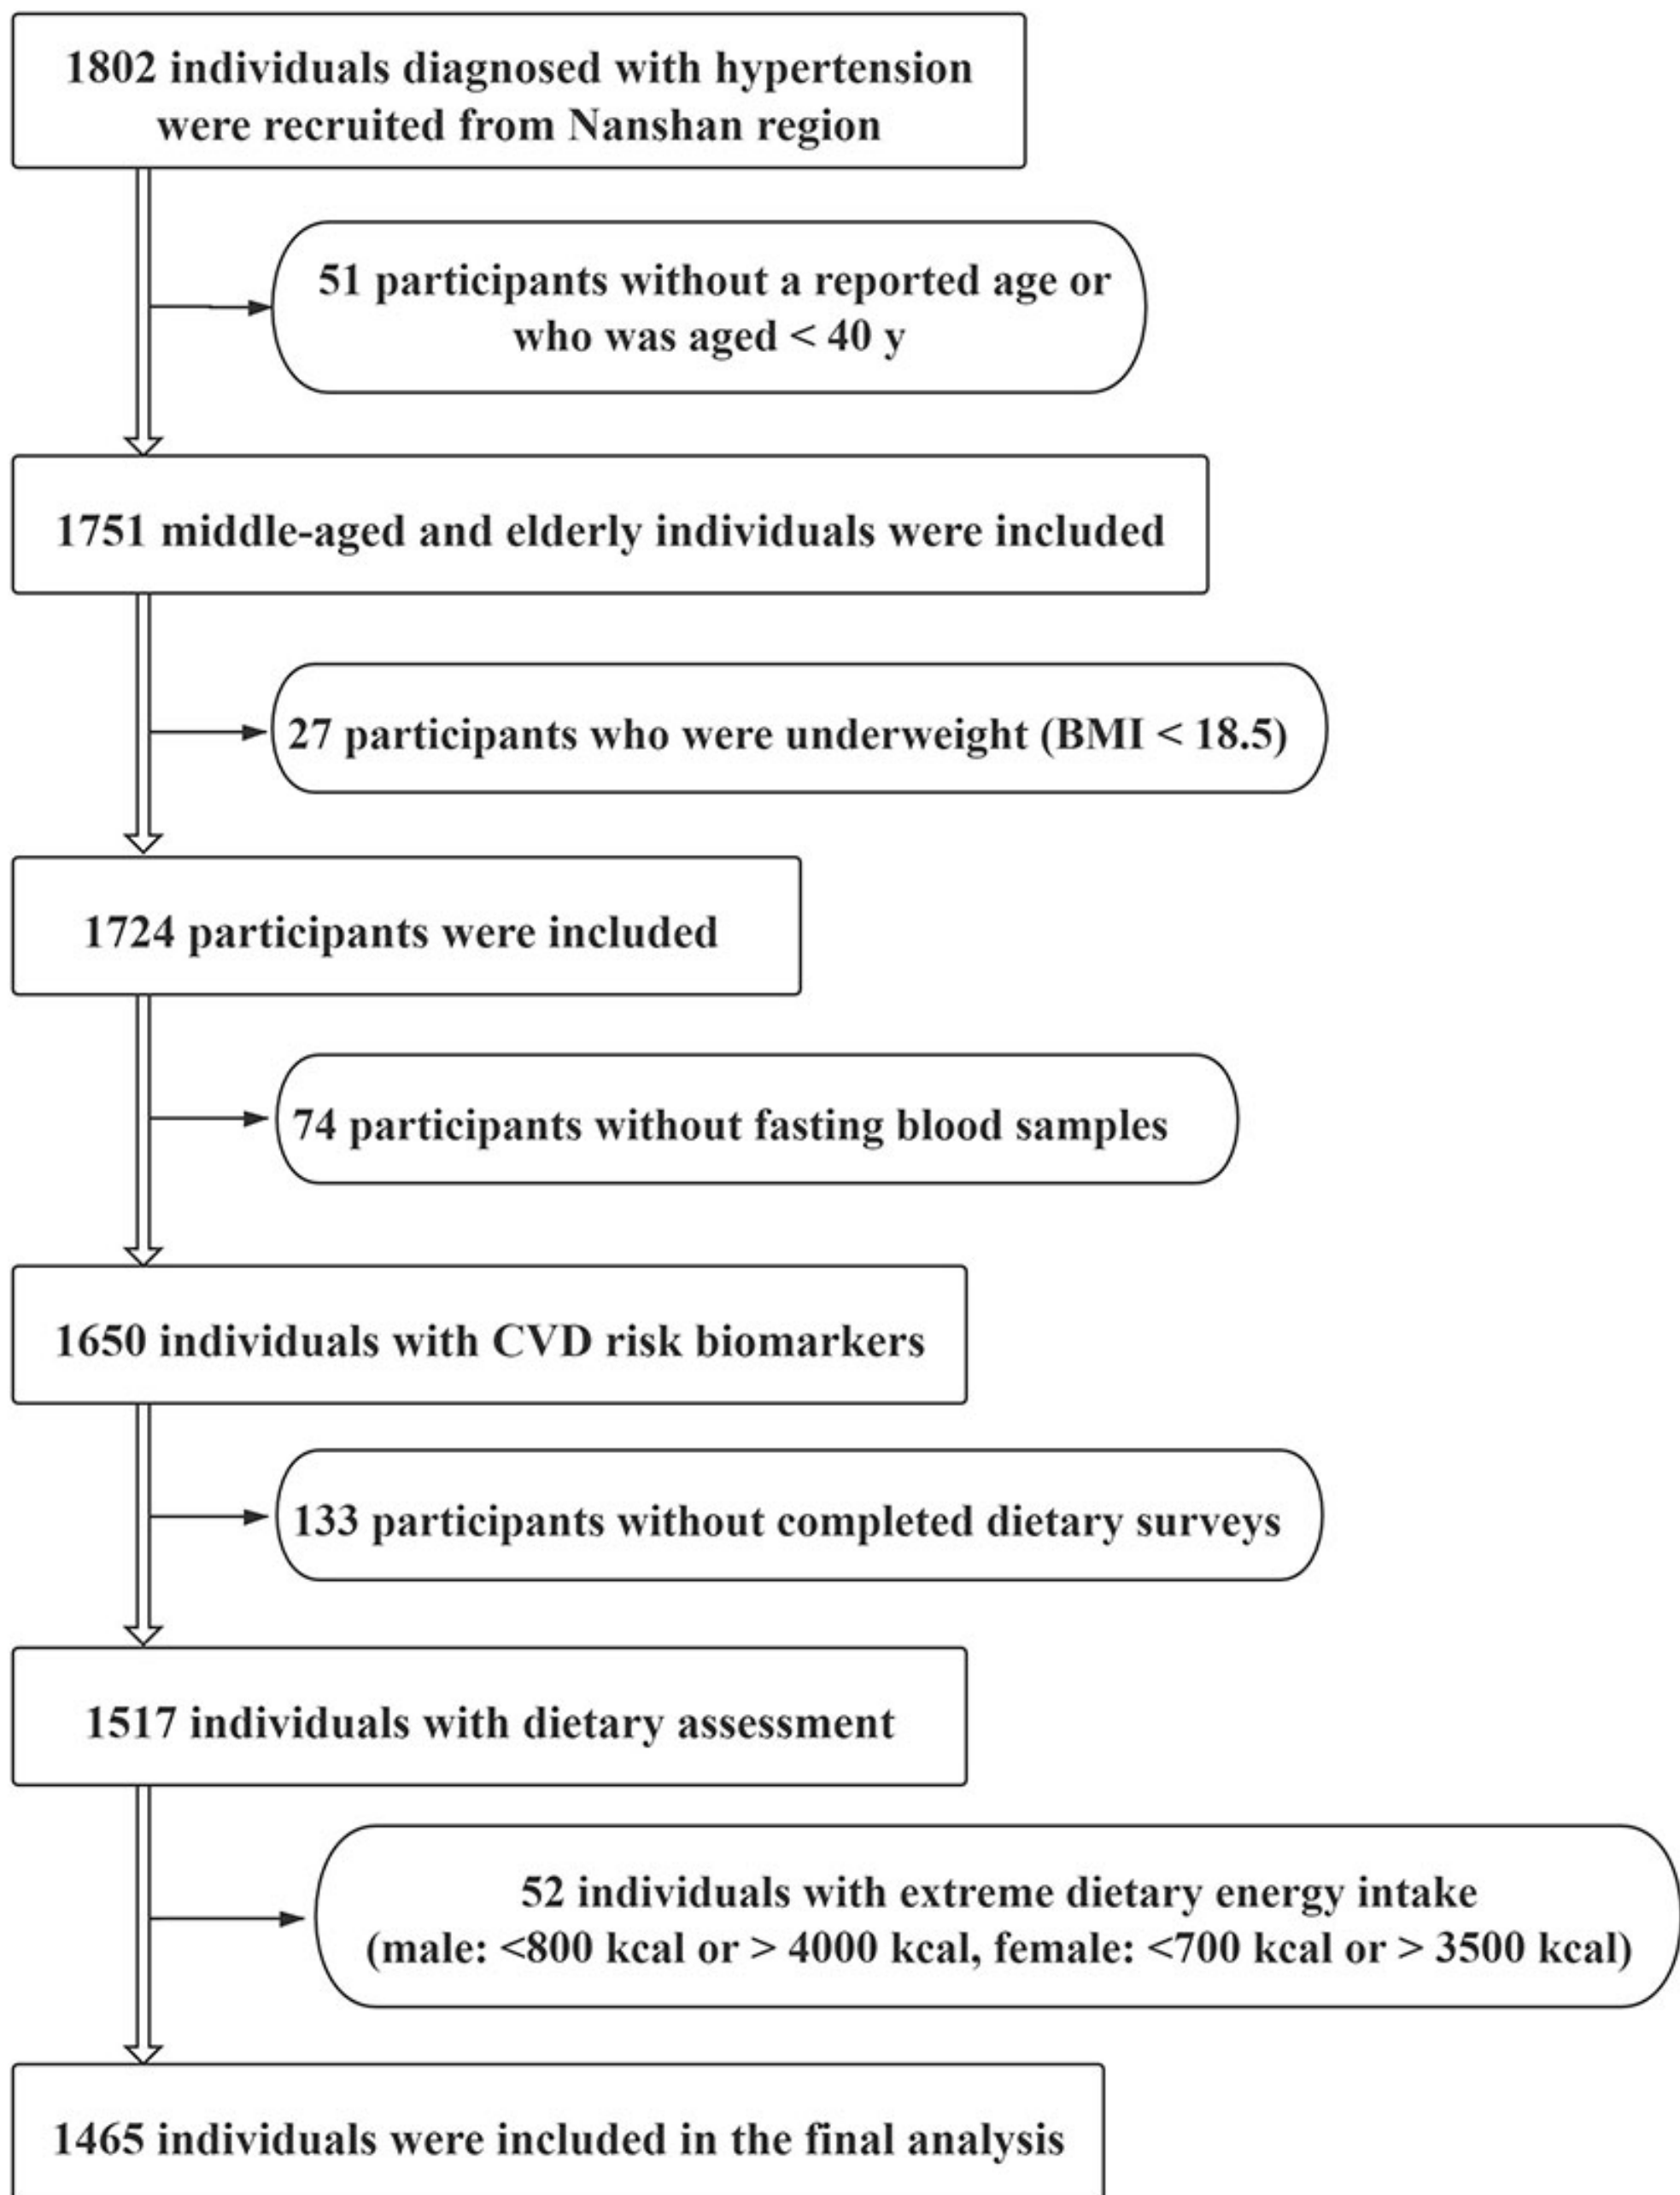

**Supplementary Fig.1 Study flow chart**
