# Supplementary material for: Association between dietary antioxidant vitamins intake and homocysteine levels in middle-aged and older adults with hypertension: a cross-sectional study
Source: HighWire-hosted journal article supplement (doi:10.1136/bmjopen-2020-045732), 2021-10-01
Supplement: bmjopen-2020-045732supp002_data_supplement.pdf [file bmjopen-2020-045732supp002_data_supplement.pdf]

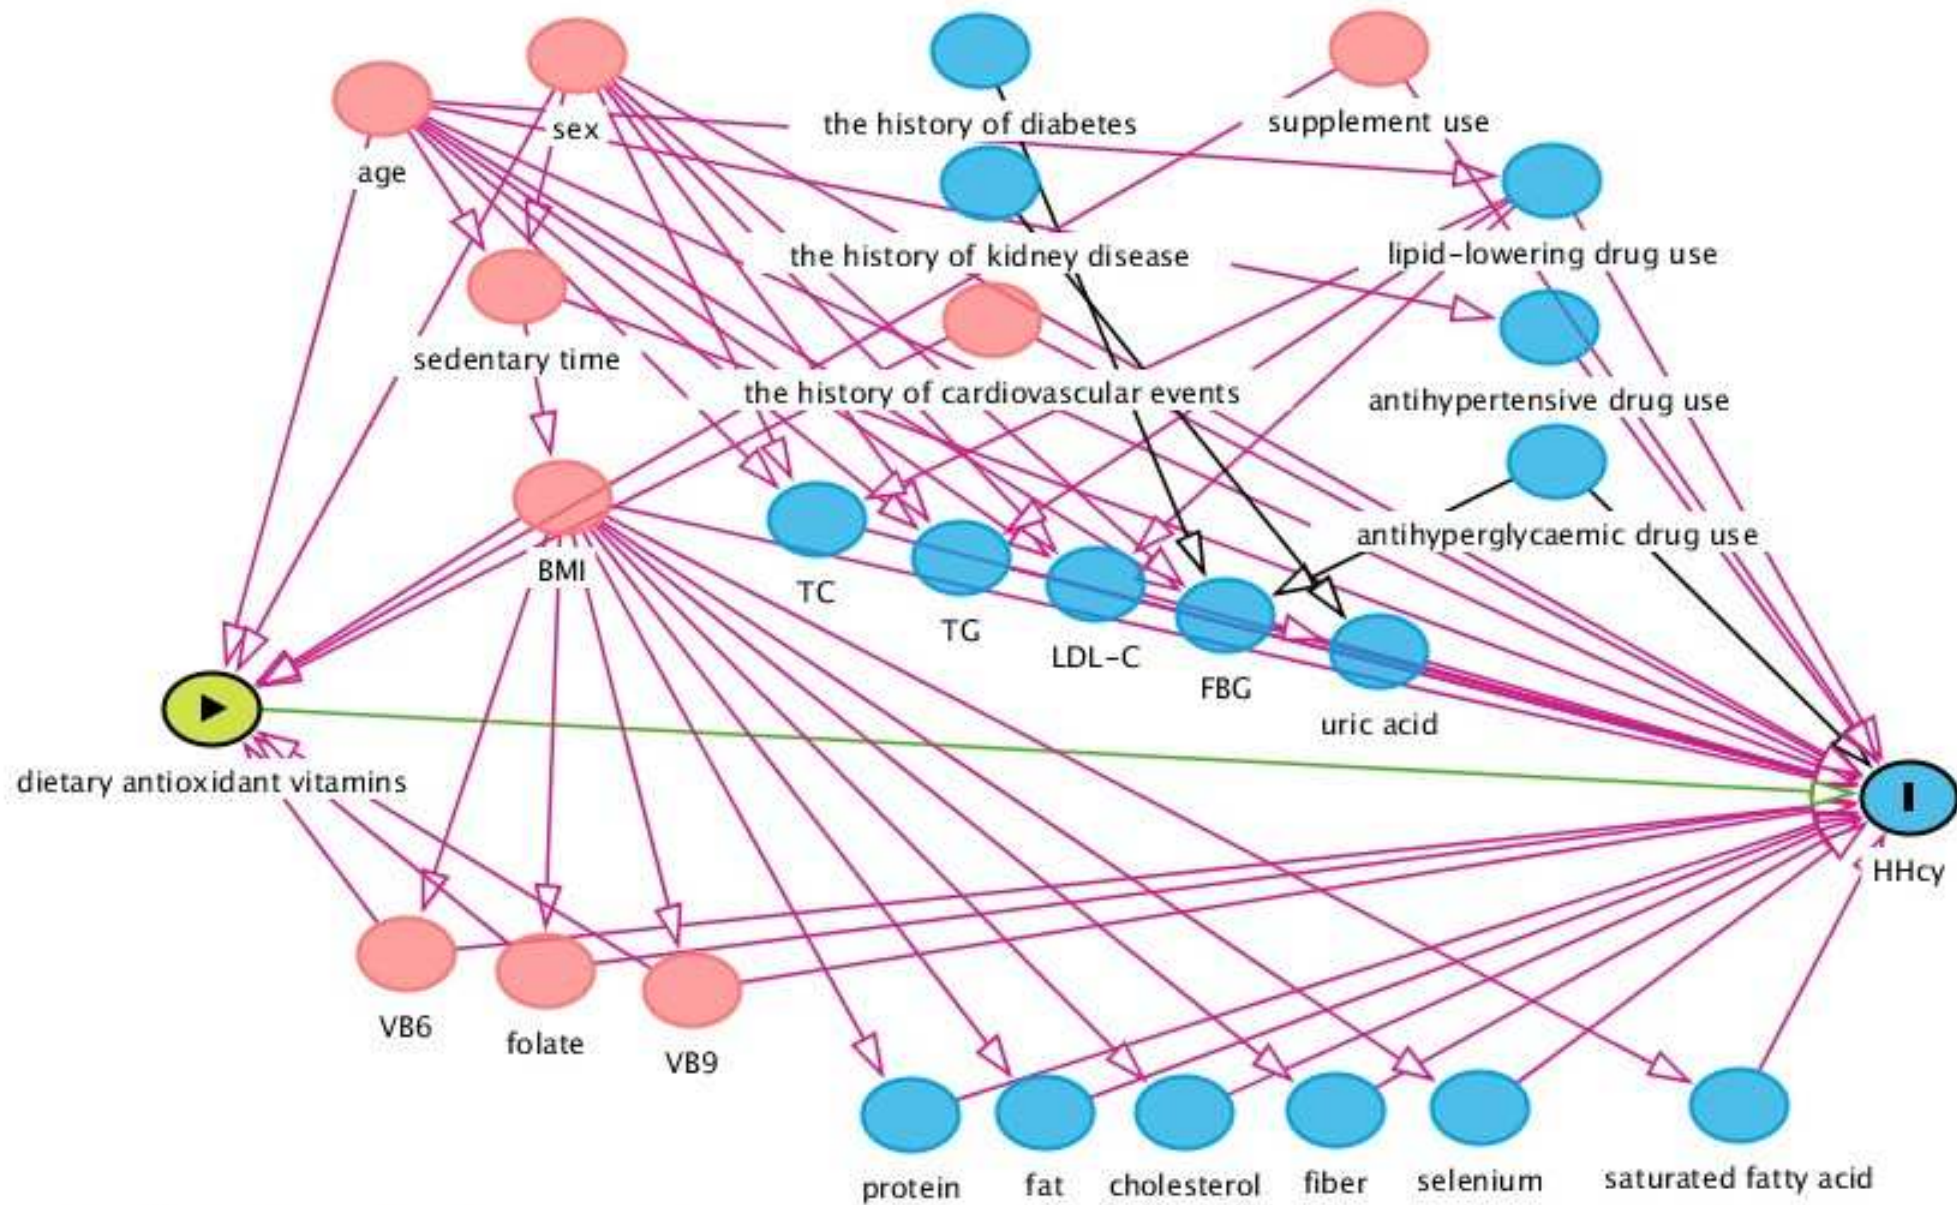

**Supplementary Figure 2** Directed acyclic graph drawn in the DAGitty programme to identify the minimum set of confounders (depicted in red) to enter the adjusted model to examine the association between dietary intakes of antioxidant vitamins and HHcy
