# Supplementary material for: Association between dietary antioxidant vitamins intake and homocysteine levels in middle-aged and older adults with hypertension: a cross-sectional study
Source: HighWire-hosted journal article supplement (doi:10.1136/bmjopen-2020-045732), 2021-10-01
Supplement: bmjopen-2020-045732supp003_data_supplement.pdf [file bmjopen-2020-045732supp003_data_supplement.pdf]

**Supplementary Table 1** Sensitivity analyses of ORs (95% CIs) of antioxidant vitamins intake for hyperhomocysteinemia prevalence in multivariable-adjusted model among the patients with hypertension <sup>#</sup>

|                                           | Q1          | Q2                | Q3                | Q4                | <i>P</i> for trend |
|-------------------------------------------|-------------|-------------------|-------------------|-------------------|--------------------|
| Without cardiovascular events (n=1245)    |             |                   |                   |                   |                    |
| Vitamin C                                 | 1.00 (Ref.) | 0.92 (0.63, 1.35) | 0.54 (0.35, 0.84) | 0.41 (0.21, 0.80) | 0.003              |
| Vitamin E                                 | 1.00 (Ref.) | 1.14 (0.79, 1.64) | 0.95 (0.66, 1.39) | 0.90 (0.62, 1.31) | 0.425              |
| Carotenes                                 | 1.00 (Ref.) | 1.25 (0.85, 1.84) | 0.67 (0.43, 1.04) | 0.77 (0.41, 1.44) | 0.178              |
| Retinol                                   | 1.00 (Ref.) | 1.05 (0.73, 1.50) | 0.61 (0.43, 0.94) | 0.78 (0.50, 1.34) | 0.836              |
| Lutein                                    | 1.00 (Ref.) | 1.04 (0.71, 1.53) | 0.74 (0.48, 1.14) | 0.63 (0.33, 1.20) | 0.104              |
| Without tHcy-lowering drug-using (n=1360) |             |                   |                   |                   |                    |
| Vitamin C                                 | 1.00 (Ref.) | 0.85 (0.58, 1.24) | 0.49 (0.31, 0.78) | 0.44 (0.22, 0.86) | 0.007              |
| Vitamin E                                 | 1.00 (Ref.) | 1.07 (0.74, 1.55) | 0.98 (0.68, 1.42) | 0.95 (0.66, 1.37) | 0.685              |
| Carotenes                                 | 1.00 (Ref.) | 1.27 (0.87, 1.85) | 0.69 (0.44, 1.07) | 0.67 (0.35, 1.28) | 0.090              |
| Retinol                                   | 1.00 (Ref.) | 0.84 (0.59, 1.20) | 0.56 (0.38, 0.84) | 0.85 (0.54, 1.35) | 0.837              |
| Lutein                                    | 1.00 (Ref.) | 0.88 (0.60, 1.29) | 0.74 (0.47, 1.15) | 0.60 (0.31, 1.16) | 0.115              |

<sup>#</sup>: Adjusted for age, sex, BMI, sedentary time (< 3 h/d' as the reference), supplement use ('no' as the reference), dietary intake of folate, vitamin B<sub>6</sub> and vitamin B<sub>12</sub>.
